# Supplementary material for: Sublimable complexes with spin switching: chemical design, processing as thin films and integration in graphene-based devices
Source: Royal Society of Chemistry journal article supplement (doi:10.1039/d2tc04120k), 2022-12-02
Supplement: d2tc04120k1.pdf [file d2tc04120k1.pdf]

## Supporting Information

**Spin-state switching sublimable complexes of the  $\{Fe^{II}(L)[(H_2B(pz)_2)_2]\}$ -type prepared as bulk and thin films. Resistive sensing of spin crossover in graphene based devices.**

**Figure S1.** (a) Thermal analysis of  $1 \cdot CH_3CN$ . (b) Comparison of calculated and experimental XRPD for  $1 \cdot CH_3CN$  and its desolvated form **1**.

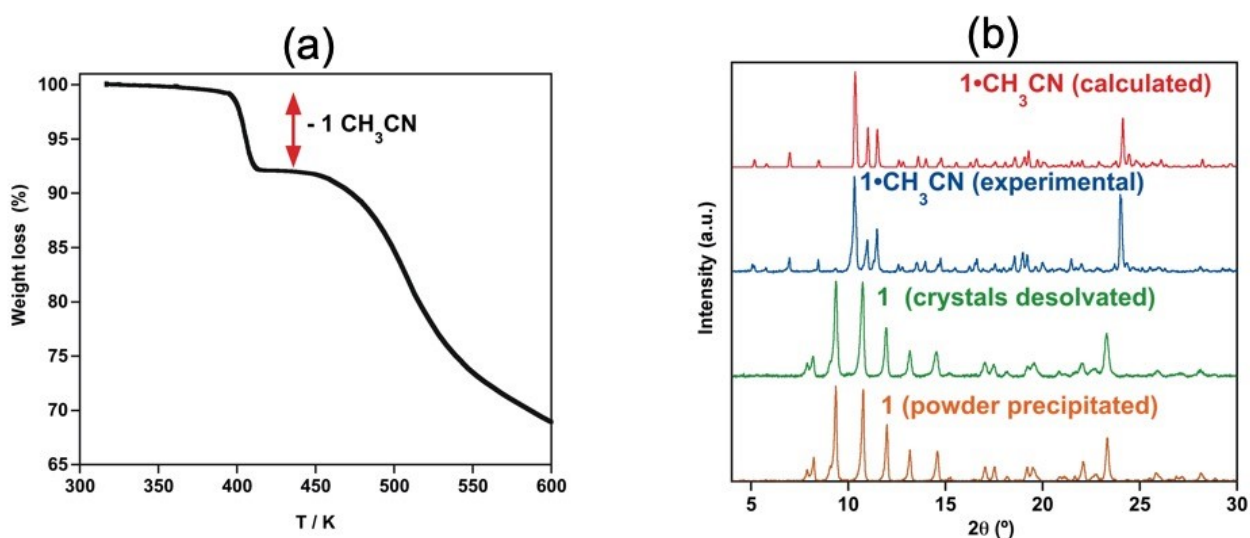

**Figure S2.** Thermal analysis of  $3 \cdot 1/2 CH_2Cl_2$ .

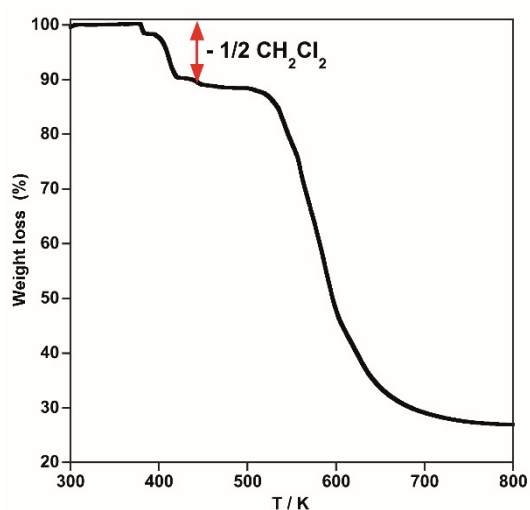

Figure S3. Molecular unit of **1**·CH<sub>3</sub>CN, site Fe(2).

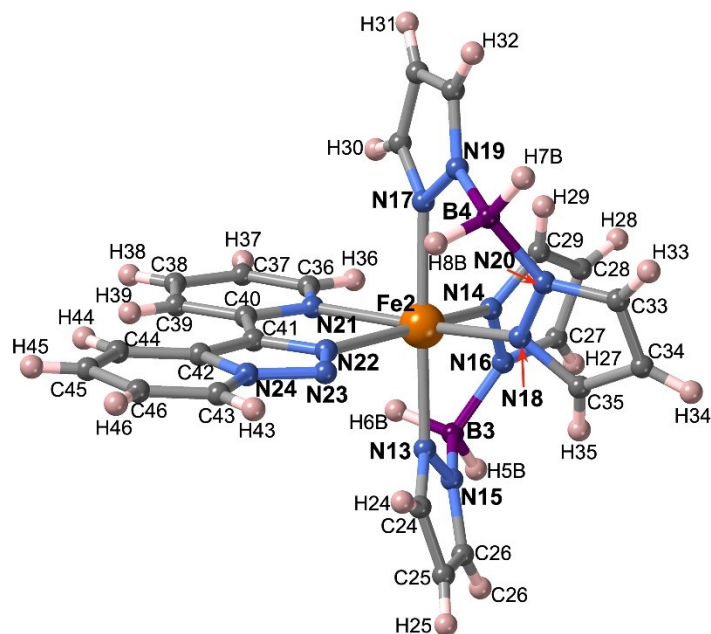

Figure S4. Short intermolecular contacts for **2** (see also Table S8).

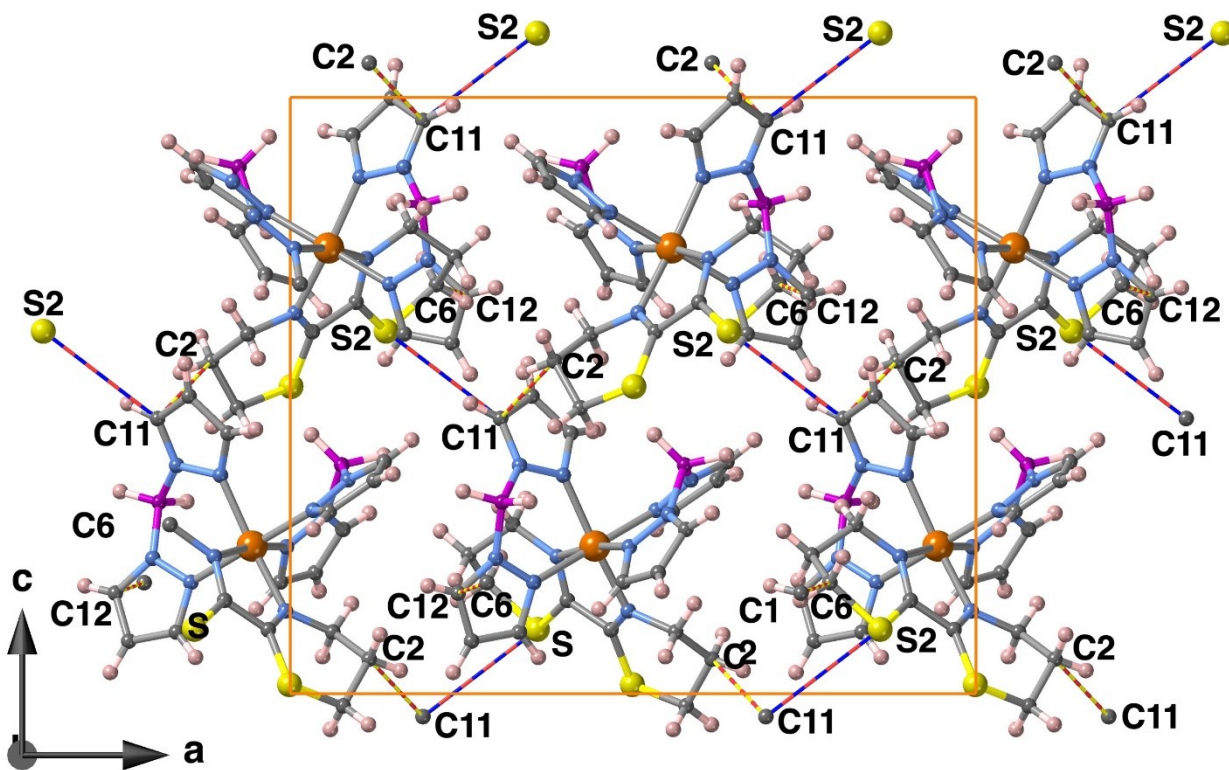

Figure S5. Crystal packing of  $3 \cdot 1/2\text{CH}_2\text{Cl}_2$  (a) and **3** (see also Table S8).

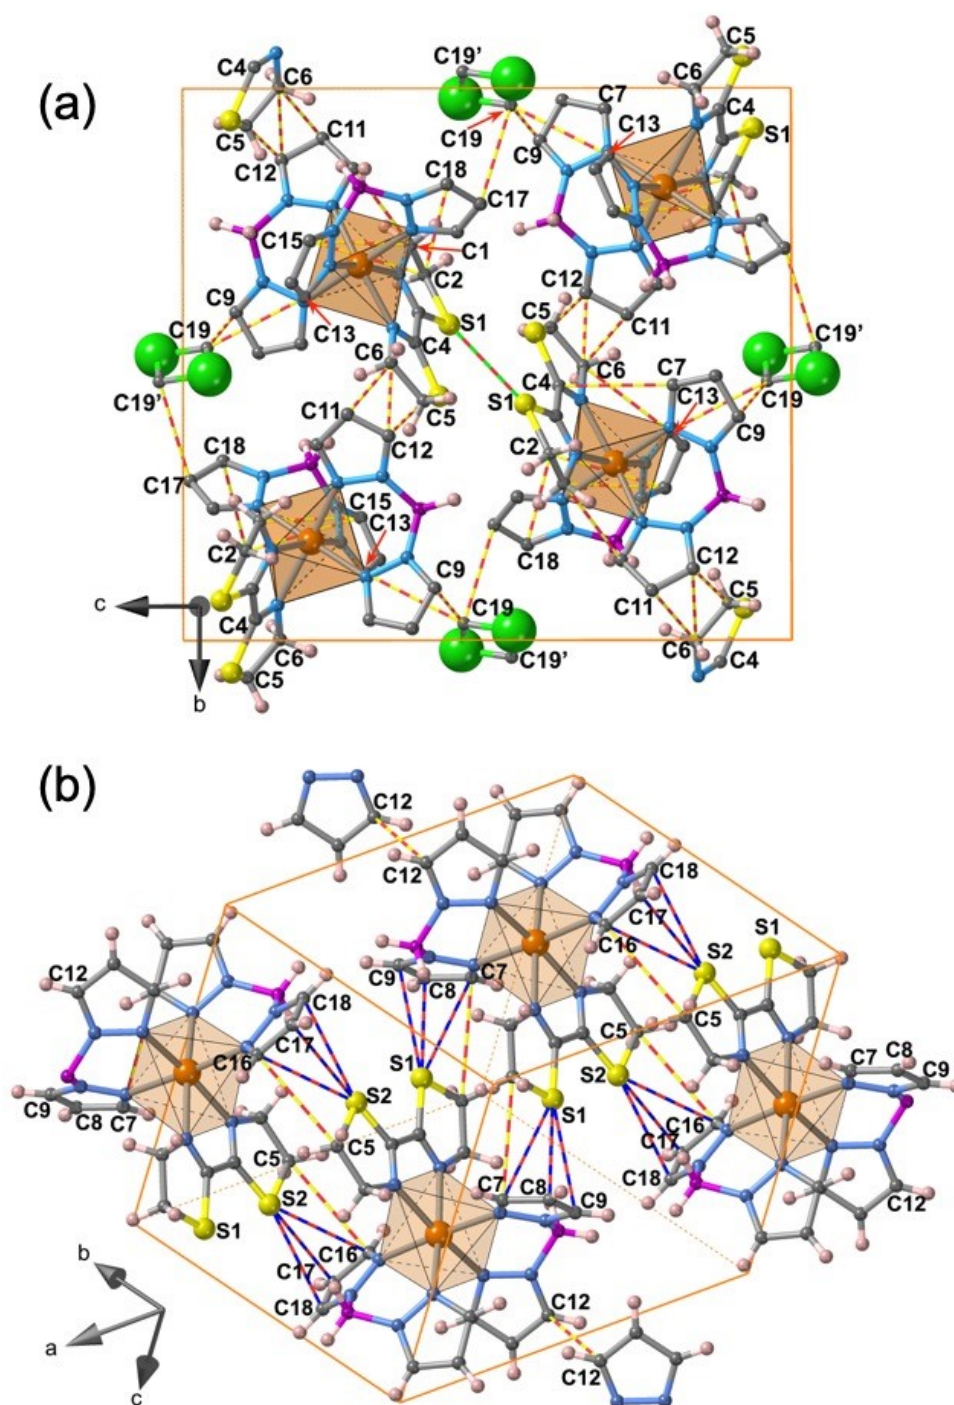

**Figure S6.** Thickness profiles of a) **TF1** and b) **TF2** integrated onto CVD-graphene devices before and after the performance of the variable temperature resistance measurements. For the collection of this data the measurements were performed at the edge of the chip where a step (thickness) of the film was measurable without requiring to scratch the surface and possibly damaging the device.

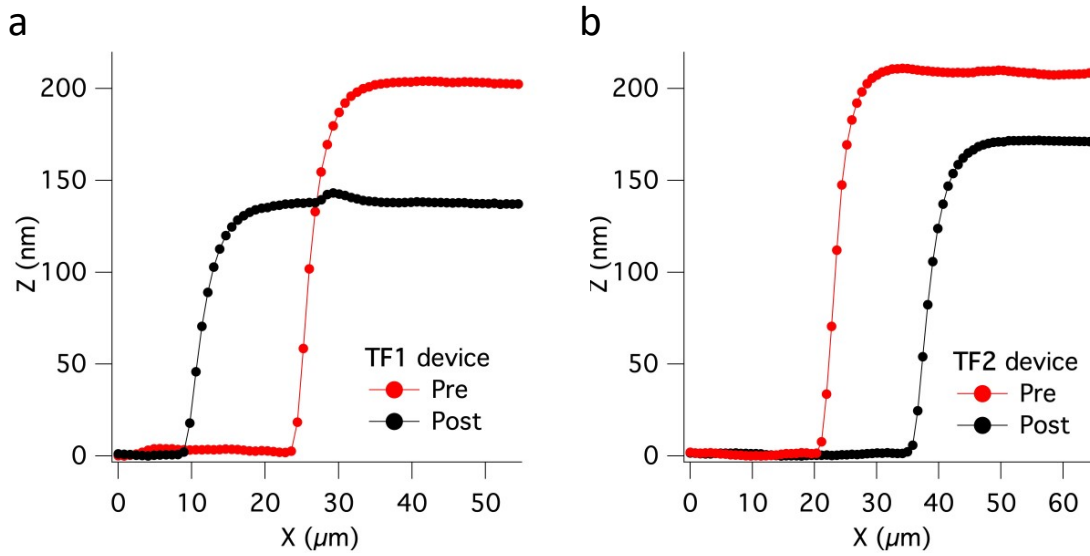

**Table S1.** Crystal data for **1·CH<sub>3</sub>CN**.

|                                                         | <b>110</b>                                                                     | <b>250</b> |
|---------------------------------------------------------|--------------------------------------------------------------------------------|------------|
| Temperature                                             |                                                                                |            |
| Empirical formula                                       | C <sub>50</sub> H <sub>54</sub> B <sub>4</sub> N <sub>26</sub> Fe <sub>2</sub> |            |
| Mr                                                      | 1174.13                                                                        |            |
| Crystal system                                          | triclinic                                                                      |            |
| Space group                                             | P-1                                                                            |            |
| <i>a</i> (Å)                                            | 10.5203(7)                                                                     | 10.7212(5) |
| <i>b</i> (Å)                                            | 15.3115(12)                                                                    | 15.5314(5) |
| <i>c</i> (Å)                                            | 17.3899(15)                                                                    | 17.7152(8) |
| $\alpha$ (°)                                            | 100.531(7)                                                                     | 100.829(3) |
| $\beta$ (°)                                             | 100.180(6)                                                                     | 100.994(4) |
| $\gamma$ (°)                                            | 90.406(6)                                                                      | 90.462(3)  |
| <i>V</i> (Å <sup>3</sup> )                              | 2708.4(4)                                                                      | 2841.2(2)  |
| <i>Z</i>                                                | 2                                                                              |            |
| <i>D<sub>c</sub></i> (mg cm <sup>-3</sup> )             | 1.440                                                                          | 1.372      |
| <i>F</i> (000)                                          | 1216                                                                           |            |
| $\mu$ (Mo-K $\alpha$ ) (mm <sup>-1</sup> )              | 0.600                                                                          | 0.572      |
| Crystal size (mm)                                       | 0.10x0.10x0.20                                                                 |            |
| No. of total reflections                                | 13689                                                                          | 14315      |
| No. of reflections [ <i>I</i> >2 $\sigma$ ( <i>I</i> )] | 8291                                                                           | 8320       |
| <i>R</i> [ <i>I</i> >2 $\sigma$ ( <i>I</i> )]           | 0.1239                                                                         | 0.0586     |
| <i>wR</i> [ <i>I</i> >2 $\sigma$ ( <i>I</i> )]          | 0.2999                                                                         | 0.1252     |
| <i>S</i>                                                | 1.061                                                                          | 0.889      |

$$R_1 = \frac{\sum ||F_o| - |F_c||}{\sum |F_o|}; wR = \left[ \frac{\sum [w(F_o^2 - F_c^2)^2]}{\sum [w(F_o^2)^2]} \right]^{1/2}.$$

$$w = 1 / [\sigma^2(F_o^2) + (m P)^2 + n P] \text{ where } P = (F_o^2 + 2F_c^2) / 3;$$

$$m = 0.1571 \text{ (1)} \text{ and } 0.0758 \text{ (2)};$$

$$n = 14.6219 \text{ (1)} \text{ and } 1.4299 \text{ (2)}$$

**Table S2.** Selected bond lengths [Å] and angles [°] for **1·CH<sub>3</sub>CN**.

|                   | <b>110 K</b> | <b>250 K</b> |
|-------------------|--------------|--------------|
| Fe(1)-N(1)        | 2.002(5)     | 2.137(3)     |
| Fe(1)-N(2)        | 2.040(6)     | 2.190(3)     |
| Fe(1)-N(5)        | 2.029(6)     | 2.145(3)     |
| Fe(1)-N(6)        | 2.014(6)     | 2.182(3)     |
| Fe(1)-N(9)        | 2.026(6)     | 2.250(3)     |
| Fe(1)-N(10)       | 1.997(6)     | 2.221(2)     |
| Fe(2)-N(13)       | 2.062(6)     | 2.170(3)     |
| Fe(2)-N(14)       | 2.036(6)     | 2.158(3)     |
| Fe(2)-N(17)       | 2.082(6)     | 2.187(3)     |
| Fe(2)-N(18)       | 2.038(6)     | 2.134(3)     |
| Fe(2)-N(21)       | 2.090(6)     | 2.231(3)     |
| Fe(2)-N(22)       | 2.041(6)     | 2.241(3)     |
|                   |              |              |
| N(1)-Fe(1)-N(2)   | 90.4(2)      | 86.91(11)    |
| N(1)-Fe(1)-N(5)   | 88.7(2)      | 95.15(10)    |
| N(1)-Fe(1)-N(6)   | 87.0(2)      | 88.54(11)    |
| N(1)-Fe(1)-N(9)   | 177.5(2)     | 173.06(10)   |
| N(1)-Fe(1)-N(10)  | 98.7(2)      | 102.54(10)   |
| N(2)-Fe(1)-N(5)   | 89.9(2)      | 94.11(11)    |
| N(2)-Fe(1)-N(6)   | 177.0(2)     | 174.41(10)   |
| N(2)-Fe(1)-N(9)   | 87.7(2)      | 87.72(10)    |
| N(2)-Fe(1)-N(10)  | 91.7(2)      | 91.59(10)    |
| N(5)-Fe(1)-N(6)   | 91.6(2)      | 89.52(11)    |
| N(5)-Fe(1)-N(9)   | 93.0(2)      | 89.62(10)    |
| N(5)-Fe(1)-N(10)  | 172.4(2)     | 161.69(11)   |
| N(6)-Fe(1)-N(9)   | 94.8(2)      | 96.56(10)    |
| N(6)-Fe(1)-N(10)  | 87.1(2)      | 86.23(10)    |
| N(9)-Fe(1)-N(10)  | 79.7(2)      | 73.21(9)     |
| N(13)-Fe(2)-N(14) | 90.6(2)      | 89.52(11)    |
| N(13)-Fe(2)-N(17) | 175.0(2)     | 177.20(11)   |
| N(13)-Fe(2)-N(18) | 87.0(2)      | 89.61(11)    |
| N(13)-Fe(2)-N(21) | 97.0(2)      | 94.74(10)    |
| N(13)-Fe(2)-N(22) | 87.5(2)      | 86.15(10)    |
| N(14)-Fe(2)-N(17) | 92.3(2)      | 91.44(10)    |
| N(14)-Fe(2)-N(18) | 91.3(2)      | 94.43(10)    |
| N(14)-Fe(2)-N(21) | 89.9(2)      | 93.62(10)    |
| N(14)-Fe(2)-N(22) | 167.5(3)     | 165.93(10)   |
| N(17)-Fe(2)-N(18) | 88.9(2)      | 87.70(10)    |
| N(17)-Fe(2)-N(21) | 87.1(2)      | 87.82(10)    |
| N(17)-Fe(2)-N(22) | 90.6(2)      | 93.53(10)    |
| N(18)-Fe(2)-N(21) | 175.9(2)     | 170.89(10)   |
| N(18)-Fe(2)-N(22) | 101.0(2)     | 98.92(9)     |
| N(21)-Fe(2)-N(22) | 78.1(2)      | 73.45(9)     |

---

**Table S3.** Crystal data for **2**.

| Temperature                                             | <b>120 K</b>                 | <b>240 K</b> |
|---------------------------------------------------------|------------------------------|--------------|
| Empirical formula                                       | $C_{20}H_{28}B_2N_{10}S_2Fe$ |              |
| <i>Mr</i>                                               | 550.11                       |              |
| Crystal system                                          | orthorhombic                 |              |
| Space group                                             | Pna2 <sub>1</sub>            |              |
| <i>a</i> (Å)                                            | 17.5600(9)                   | 18.9537(6)   |
| <i>b</i> (Å)                                            | 9.3009(3)                    | 9.1407(3)    |
| <i>c</i> (Å)                                            | 15.2714(6)                   | 15.2247(4)   |
| <i>V</i> (Å <sup>3</sup> )                              | 2494.2(2)                    | 2637.68(14)  |
| <i>Z</i>                                                | 4                            |              |
| <i>D<sub>c</sub></i> (mg cm <sup>-3</sup> )             | 1.465                        | 1.385        |
| <i>F</i> (000)                                          | 1144                         |              |
| $\mu$ (Mo-K $\alpha$ ) (mm <sup>-1</sup> )              | 0.804                        | 0.760        |
| Crystal size (mm)                                       | 0.08x0.10x0.18               |              |
| No. of total reflections                                | 4559                         | 4738         |
| No. of reflections [ <i>I</i> >2 $\sigma$ ( <i>I</i> )] | 3920                         | 3236         |
| <i>R</i> [ <i>I</i> >2 $\sigma$ ( <i>I</i> )]           | 0.0376                       | 0.0493       |
| <i>wR</i> [ <i>I</i> >2 $\sigma$ ( <i>I</i> )]          | 0.0952                       | 0.1021       |
| <i>S</i>                                                | 0.786                        | 0.917        |

**Table S4.** Selected bond lengths [Å] and angles [°] for **2**.

|              | <b>120 K</b> | <b>240 K</b> |
|--------------|--------------|--------------|
| Fe-N(1)      | 1.955(4)     | 2.199(5)     |
| Fe-N(2)      | 1.980(3)     | 2.247(5)     |
| Fe-N(3)      | 2.002(4)     | 2.124(5)     |
| Fe-N(4)      | 2.001(3)     | 2.180(5)     |
| Fe-N(5)      | 1.977(3)     | 2.154(5)     |
| Fe-N(6)      | 1.994(3)     | 2.128(4)     |
| <Fe-N>       | 1.985        | 2.172        |
| N(1)-Fe-N(2) | 80.75(14)    | 73.1(2)      |
| N(1)-Fe-N(3) | 168.92(14)   | 162.61(18)   |
| N(1)-Fe-N(4) | 93.95(15)    | 93.28(19)    |
| N(1)-Fe-N(5) | 85.98(14)    | 84.94(19)    |
| N(1)-Fe-N(6) | 93.84(15)    | 93.6(2)      |
| N(2)-Fe-N(3) | 91.51(14)    | 90.7(2)      |
| N(2)-Fe-N(4) | 84.72(13)    | 82.9(2)      |
| N(2)-Fe-N(5) | 96.03(13)    | 96.34(19)    |
| N(2)-Fe-N(6) | 170.95(16)   | 165.1(2)     |
| N(3)-Fe-N(4) | 93.21(15)    | 90.8(2)      |
| N(3)-Fe-N(5) | 86.98(14)    | 90.86(19)    |
| N(3)-Fe-N(6) | 94.80(15)    | 103.2(2)     |
| N(4)-Fe-N(5) | 179.21(14)   | 178.2(2)     |
| N(4)-Fe-N(6) | 88.44(13)    | 91.33(19)    |
| N(5)-Fe-N(6) | 90.78(13)    | 89.04(18)    |

---



**Table S5.** Crystal data for **3·1/2CH<sub>2</sub>Cl<sub>2</sub>** and **3**.

|                                                             | <b>3·1/2CH<sub>2</sub>Cl<sub>2</sub></b>                                                           |              | <b>3</b>                                                                         |
|-------------------------------------------------------------|----------------------------------------------------------------------------------------------------|--------------|----------------------------------------------------------------------------------|
|                                                             | <b>120 K</b>                                                                                       | <b>220 K</b> | <b>120 K</b>                                                                     |
| Temperature                                                 |                                                                                                    |              |                                                                                  |
| Empirical formula                                           | C <sub>18.5</sub> H <sub>25</sub> B <sub>2</sub> Cl <sub>1</sub> N <sub>10</sub> S <sub>2</sub> Fe |              | C <sub>18</sub> H <sub>24</sub> B <sub>2</sub> N <sub>10</sub> S <sub>2</sub> Fe |
| <i>Mr</i>                                                   | 546.52                                                                                             |              | 522.06                                                                           |
| Crystal system                                              | monoclinic                                                                                         |              | triclinic                                                                        |
| Space group                                                 | P2 <sub>1</sub> /c                                                                                 |              | P-1                                                                              |
| <i>a</i> (Å)                                                | 8.3943(3)                                                                                          | 8.5966(3)    | 10.6049(11)                                                                      |
| <i>b</i> (Å)                                                | 16.3890(7)                                                                                         | 16.4233(4)   | 11.4786(12)                                                                      |
| <i>c</i> (Å)                                                | 18.3407(7)                                                                                         | 18.4914(5)   | 11.8227(14)                                                                      |
| $\alpha$ (°)                                                |                                                                                                    |              | 80.328(9)                                                                        |
| $\beta$ (°)                                                 | 100.121(4)                                                                                         | 101.100(3)   | 64.876(11)                                                                       |
| $\gamma$ (°)                                                |                                                                                                    |              | 65.734(10)                                                                       |
| <i>V</i> (Å <sup>3</sup> )                                  | 2483.9(2)                                                                                          | 2561.86(13)  | 1187.9(3)                                                                        |
| <i>Z</i>                                                    |                                                                                                    | 4            | 2                                                                                |
| <i>D<sub>c</sub></i> (mg cm <sup>-3</sup> )                 | 1.510                                                                                              | 1.464        | 1.460                                                                            |
| <i>F</i> (000)                                              | 1164                                                                                               |              | 540                                                                              |
| $\mu$ (Mo-K $\alpha$ ) (mm <sup>-1</sup> )                  | 0.913                                                                                              | 0.885        | 0.839                                                                            |
| Crystal size (mm)                                           | 0.03x0.04x0.08                                                                                     |              | 0.06x0.15x0.15                                                                   |
| No. of total reflections                                    | 6428                                                                                               | 6780         | 5899                                                                             |
| No. of reflections<br>[ <i>I</i> > 2 $\sigma$ ( <i>I</i> )] | 3735                                                                                               | 3914         | 3625                                                                             |
| <i>R</i> [ <i>I</i> > 2 $\sigma$ ( <i>I</i> )]              | 0.0644                                                                                             | 0.0654       | 0.0864                                                                           |
| <i>wR</i> [ <i>I</i> > 2 $\sigma$ ( <i>I</i> )]             | 0.1474                                                                                             | 0.1973       | 0.2046                                                                           |
| <i>S</i>                                                    | 0.884                                                                                              | 0.857        | 0.902                                                                            |

$$R_1 = \sum ||F_o| - |F_c|| / \sum |F_o|; wR = [ \sum [w(F_o^2 - F_c^2)^2] / \sum [w(F_o^2)^2] ]^{1/2}.$$

$$w = 1 / [\sigma^2(F_o^2) + (m P)^2 + n P] \text{ where } P = (F_o^2 + 2F_c^2) / 3;$$

$$m = 0.1008 \text{ (1)}, 0.2000 \text{ (2)} \text{ and } 0.1451 \text{ (3)};$$

$$n = 6.1831 \text{ (1)}, 0.0000 \text{ (2)} \text{ and } 0.0000 \text{ (3)}$$

**Table S6.** Selected bond lengths [Å] and angles [°].

|              | <b>3·1/2CH<sub>2</sub>Cl<sub>2</sub></b> |              | <b>3</b>     |
|--------------|------------------------------------------|--------------|--------------|
|              | <b>120 K</b>                             | <b>220 K</b> | <b>120 K</b> |
| Fe-N(1)      | 2.127(4)                                 | 2.237(4)     | 2.213(3)     |
| Fe-N(2)      | 2.152(4)                                 | 2.262(4)     | 2.220(3)     |
| Fe-N(3)      | 2.116(4)                                 | 2.182(4)     | 2.182(4)     |
| Fe-N(4)      | 2.074(4)                                 | 2.127(4)     | 2.160(3)     |
| Fe-N(5)      | 2.069(4)                                 | 2.124(4)     | 2.159(3)     |
| Fe-N(6)      | 2.081(4)                                 | 2.157(4)     | 2.173(4)     |
|              |                                          |              |              |
| N(1)-Fe-N(2) | 75.95(14)                                | 73.46(14)    | 74.55(13)    |
| N(1)-Fe-N(3) | 92.75(14)                                | 92.54(13)    | 90.92(13)    |
| N(1)-Fe-N(4) | 90.64(15)                                | 90.65(13)    | 98.05(12)    |
| N(1)-Fe-N(5) | 168.71(15)                               | 165.08(15)   | 172.32(13)   |
| N(1)-Fe-N(6) | 90.15(14)                                | 88.89(14)    | 91.57(13)    |
| N(2)-Fe-N(3) | 88.42(14)                                | 87.59(13)    | 89.68(13)    |
| N(2)-Fe-N(4) | 166.22(15)                               | 163.27(14)   | 172.59(12)   |
| N(2)-Fe-N(5) | 93.31(15)                                | 92.56(15)    | 97.93(13)    |
| N(2)-Fe-N(6) | 91.84(14)                                | 91.92(13)    | 92.61(13)    |
| N(3)-Fe-N(4) | 89.14(15)                                | 87.92(14)    | 90.32(13)    |
| N(3)-Fe-N(5) | 90.37(15)                                | 92.02(14)    | 87.45(13)    |
| N(3)-Fe-N(6) | 177.06(15)                               | 178.29(14)   | 176.98(12)   |
| N(4)-Fe-N(5) | 100.26(15)                               | 103.70(14)   | 89.48(13)    |
| N(4)-Fe-N(6) | 91.30(15)                                | 93.00(14)    | 87.66(13)    |
| N(5)-Fe-N(6) | 86.69(15)                                | 86.36(15)    | 90.30(13)    |

---

**Table S7.** Intermolecular interactions for **1·CH<sub>3</sub>CN** (see also **Figure 4**).

| 110 K                                            |       | 250 K                                             |       |
|--------------------------------------------------|-------|---------------------------------------------------|-------|
| <b>py<sup>(Fe2)</sup>...tzpy<sup>(Fe1)</sup></b> |       | <b>py<sup>(Fe2)</sup>...tzpy<sup>(Fe1)</sup></b>  |       |
| C37...C18                                        | 3.380 | C37...C18                                         | 3.582 |
| C38...C19                                        | 3.283 | C38...C18                                         | 3.577 |
| C39...C19                                        | 3.523 | C38...C19                                         | 3.414 |
| C39...C20                                        | 3.485 | C39...C19                                         | 3.595 |
| C38...C18                                        | 3.424 | C39...C19                                         | 3.595 |
| C37...C19                                        | 3.491 | C40...C22                                         | 3.569 |
| C40...C21                                        | 3.508 |                                                   |       |
| C40...C22                                        | 3.467 |                                                   |       |
| <b>py<sup>(Fe1)</sup>...tzpy<sup>(Fe2)</sup></b> |       | <b>tzpy<sup>(Fe2)</sup>... py<sup>(Fe1)</sup></b> |       |
| C41...C14                                        | 3.560 |                                                   |       |
| C41...C15                                        | 3.486 | C41...C14                                         | 3.460 |
| C42...C15                                        | 3.326 | C41...C15                                         | 3.526 |
| C43...C15                                        | 3.475 | C42...C14                                         | 3.593 |
| C42...C16                                        | 3.524 | C42...C15                                         | 3.401 |
| C43...C16                                        | 3.514 | C43...C15                                         | 3.461 |
| C44...C16                                        | 3.593 | C43...C16                                         | 3.523 |
| C44...C17                                        | 3.580 | C45...C17                                         | 3.564 |
| C45...C17                                        | 3.504 | C45...C17                                         | 3.564 |
| <b>pz<sup>(Fe1)</sup>...pz<sup>(Fe1)</sup></b>   |       | <b>pz<sup>(Fe1)</sup>...pz<sup>(Fe1)</sup></b>    |       |
| C11...C11                                        | 3.582 | C7...C7                                           | 3.474 |
| <b>pz<sup>(Fe1)</sup>... pz<sup>(Fe2)</sup></b>  |       | <b>pz<sup>(Fe1)</sup>...pz<sup>(Fe2)</sup></b>    |       |
| C9...C33                                         | 3.346 | C2...C27                                          | 3.497 |
| C9...C34                                         | 3.530 | C3...C27                                          | 3.405 |
| C7...C31                                         | 3.570 | C5...C33                                          | 3.380 |
| C3...C31                                         | 3.381 |                                                   |       |
| <b>pz<sup>(Fe2)</sup>...pz<sup>(Fe2)</sup></b>   |       | <b>pz...CH<sub>3</sub>CN</b>                      |       |
| C28...C32                                        | 3.511 | C3...C50                                          | 3.483 |
| C29...C29                                        | 3.394 | C33...C48                                         | 3.403 |
| C25...C26                                        | 3.597 |                                                   |       |
| <b>py<sup>(Fe1)</sup>...py<sup>(Fe2)</sup></b>   |       |                                                   |       |
| C17...C35                                        | 3.551 |                                                   |       |
| <b>tzpy<sup>(Fe1)</sup>...CH<sub>3</sub>CN</b>   |       |                                                   |       |
| C23...C49                                        | 3.568 |                                                   |       |
| <b>pz<sup>(Fe1)</sup>...CH<sub>3</sub>CN</b>     |       |                                                   |       |
| C2...C50                                         | 3.543 |                                                   |       |
| C3...C50                                         | 3.324 |                                                   |       |
| <b>pz<sup>(Fe2)</sup>...CH<sub>3</sub>CN</b>     |       |                                                   |       |
| C33...C48                                        | 3.363 |                                                   |       |
| C34...C48                                        | 3.576 |                                                   |       |

**Table S8.** Intermolecular interactions for **2**, **3·1/2CH<sub>2</sub>Cl<sub>2</sub>** and **3** (see also **Figure S5a,b**).

| Intermolecular Contacts for <b>2</b> | 120 K | 240 K |
|--------------------------------------|-------|-------|
| C12...C6                             | 3.506 | ---   |
| C2...C11                             | 3.507 | ---   |
| C12...C6'                            | 3.698 | ---   |

| Intermolecular Contacts for <b>3·1/2CH<sub>2</sub>Cl<sub>2</sub></b> | 120 K | 220 K |
|----------------------------------------------------------------------|-------|-------|
| S1...S1                                                              | 3.365 | 3.356 |
| C1...C15                                                             | 3.396 | 3.437 |
| C2...C15                                                             | 3.562 | ---   |
| C2...C18                                                             | 3.439 | 3.485 |
| C5...C12                                                             | 3.458 | 3.558 |
| C6...C11                                                             | 3.569 | ---   |
| C6...C12                                                             | 3.570 | ---   |
| C19...C9                                                             | 3.450 | 3.524 |
| C19...C13                                                            | 3.393 | 3.552 |
| C19...C17                                                            | 3.430 | 3.586 |

| Intermolecular Contacts for <b>3</b> | 120 K |
|--------------------------------------|-------|
| C12...C12                            | 3.480 |
| C7...C2                              | 3.539 |
| C16...C5                             | 3.485 |
| S1...C7                              | 3.552 |
| S1...C8                              | 3.457 |
| S1...C9                              | 3.397 |
| S2...C16                             | 3.517 |
| S2...C17                             | 3.504 |
| S2...C18                             | 3.453 |
